# Supplementary material for: Evolutionary Significance of NHX Family and NHX1 in Salinity Stress Adaptation in the Genus Oryza
Source: MDPI journal article supplement (doi:10.3390/ijms23042092), 2022-02-14
Supplement: s1 [file s1]

| Species                           | <i>Arabidopsis thaliana</i> | <i>Oryza sativa</i> | <i>Oryza coarctata</i> | <i>Zea mays</i> | <i>Picea sitchensis</i> | <i>Pteris vittata</i> | <i>Selaginella moellendorffii</i> | <i>Marchantia polymorpha</i> | <i>Klebsormidium nitens</i> | <i>Volvox carteri</i> | <i>Dictyostelium discoideum</i> |
|-----------------------------------|-----------------------------|---------------------|------------------------|-----------------|-------------------------|-----------------------|-----------------------------------|------------------------------|-----------------------------|-----------------------|---------------------------------|
| <i>Arabidopsis thaliana</i>       |                             | 80.6                | 83.1                   | 78.4            | 82.3                    | 84.1                  | 80.7                              | 84.1                         | 78.4                        | 67.4                  | 59.4                            |
| <i>Oryza sativa</i>               | 80.6                        |                     | 88.6                   | 84.8            | 88                      | 83.8                  | 81.9                              | 83.6                         | 80                          | 68.1                  | 59.7                            |
| <i>Oryza coarctata</i>            | 83.1                        | 88.6                |                        | 86.2            | 90.2                    | 86.9                  | 83                                | 85.1                         | 79.5                        | 66.6                  | 62                              |
| <i>Zea mays</i>                   | 78.4                        | 84.8                | 86.2                   |                 | 84.4                    | 83.3                  | 76.3                              | 78.9                         | 76.9                        | 65.6                  | 60.3                            |
| <i>Picea sitchensis</i>           | 82.3                        | 88                  | 90.2                   | 84.4            |                         | 87.2                  | 85                                | 86.2                         | 79.6                        | 66.6                  | 60.9                            |
| <i>Pteris vittata</i>             | 84.1                        | 83.8                | 86.9                   | 83.3            | 87.2                    |                       | 85.8                              | 90                           | 82.5                        | 64.8                  | 64.6                            |
| <i>Selaginella moellendorffii</i> | 80.7                        | 81.9                | 83                     | 76.3            | 85                      | 85.8                  |                                   | 84.4                         | 78.4                        | 66.4                  | 61                              |
| <i>Marchantia polymorpha</i>      | 84.1                        | 83.6                | 85.1                   | 78.9            | 86.2                    | 90                    | 84.4                              |                              | 82.1                        | 63.9                  | 61.3                            |
| <i>Klebsormidium nitens</i>       | 78.4                        | 80                  | 79.5                   | 76.9            | 79.6                    | 82.5                  | 78.4                              | 82.1                         |                             | 66.5                  | 56.3                            |
| <i>Volvox carteri</i>             | 67.4                        | 68.1                | 66.6                   | 65.6            | 66.6                    | 64.8                  | 66.4                              | 63.9                         | 66.5                        |                       | 57.2                            |
| <i>Dictyostelium discoideum</i>   | 59.4                        | 59.7                | 62                     | 60.3            | 60.9                    | 64.6                  | 61                                | 61.3                         | 56.3                        | 57.2                  |                                 |

**Figure S1.** Sequence identity of *NHX1* in representative plant species.

|               | <i>OsNHX1</i> | <i>OsNHX2</i> | <i>OsNHX3</i> | <i>OsNHX4</i> | <i>OsNHX5</i> | <i>OsNHX6</i> | <i>OsNHX7</i> |
|---------------|---------------|---------------|---------------|---------------|---------------|---------------|---------------|
| <i>OsNHX1</i> |               | 81.7          | 80.3          | 63            | 28.4          | 35            | 20.3          |
| <i>OsNHX2</i> | 81.7          |               | 79.9          | 62.6          | 30.1          | 34.5          | 20.6          |
| <i>OsNHX3</i> | 80.3          | 79.9          |               | 61.9          | 29.1          | 36.1          | 19.4          |
| <i>OsNHX4</i> | 63            | 62.6          | 61.9          |               | 26.8          | 29.8          | 18.1          |
| <i>OsNHX5</i> | 28.4          | 30.1          | 29.1          | 26.8          |               | 49.4          | 15.5          |
| <i>OsNHX6</i> | 35            | 34.5          | 36.1          | 29.8          | 49.4          |               | 14.9          |
| <i>OsNHX7</i> | 20.3          | 20.6          | 19.4          | 18.1          | 15.5          | 14.9          |               |

**Figure S2.** Sequence identity of putative NHXs mapped in *Oryza sativa*.

|                                         | <i>O. sativa</i> subsp. <i>japonica</i><br><i>O. sativa</i> subsp. <i>indica</i><br><i>O. glaberrima</i><br><i>O. nivara</i><br><i>O. rufipogon</i><br><i>O. meridionalis</i><br><i>O. glumaepatula</i><br><i>O. punctata</i><br><i>O. barthii</i><br><i>O. brachyantha</i><br><i>O. coarctata</i> |      |      |      |      |      |      |      |      |      |      |
|-----------------------------------------|----------------------------------------------------------------------------------------------------------------------------------------------------------------------------------------------------------------------------------------------------------------------------------------------------|------|------|------|------|------|------|------|------|------|------|
| <i>O. sativa</i> subsp. <i>japonica</i> |                                                                                                                                                                                                                                                                                                    | 91.8 | 91.8 | 91.6 | 91.4 | 91.4 | 87.9 | 90.3 | 90.6 | 89   | 89.3 |
| <i>O. sativa</i> subsp. <i>indica</i>   | 91.8                                                                                                                                                                                                                                                                                               |      | 100  | 99.8 | 99.6 | 99.6 | 95.7 | 98.5 | 99.6 | 97.9 | 97.2 |
| <i>O. glaberrima</i>                    | 91.8                                                                                                                                                                                                                                                                                               | 100  |      | 99.8 | 99.6 | 99.6 | 95.7 | 98.5 | 99.6 | 97.9 | 97.2 |
| <i>O. nivara</i>                        | 91.6                                                                                                                                                                                                                                                                                               | 99.8 | 99.8 |      | 99.8 | 99.4 | 95.9 | 98.3 | 99.4 | 98.1 | 96.8 |
| <i>O. rufipogon</i>                     | 91.4                                                                                                                                                                                                                                                                                               | 99.6 | 99.6 | 99.8 |      | 99.3 | 95.7 | 98.1 | 99.2 | 97.9 | 96.8 |
| <i>O. meridionalis</i>                  | 91.4                                                                                                                                                                                                                                                                                               | 99.6 | 99.6 | 99.4 | 99.3 |      | 95.3 | 98.7 | 99.2 | 98.1 | 97.2 |
| <i>O. glumaepatula</i>                  | 87.9                                                                                                                                                                                                                                                                                               | 95.7 | 95.7 | 95.9 | 95.7 | 95.3 |      | 94.2 | 95.2 | 93.5 | 92.9 |
| <i>O. punctata</i>                      | 90.3                                                                                                                                                                                                                                                                                               | 98.5 | 98.5 | 98.3 | 98.1 | 98.7 | 94.2 |      | 98.3 | 98.3 | 97.8 |
| <i>O. barthii</i>                       | 90.6                                                                                                                                                                                                                                                                                               | 99.6 | 99.6 | 99.4 | 99.2 | 99.2 | 95.2 | 98.3 |      | 97.5 | 97.5 |
| <i>O. brachyantha</i>                   | 89                                                                                                                                                                                                                                                                                                 | 97.9 | 97.9 | 98.1 | 97.9 | 98.1 | 93.5 | 98.3 | 97.5 |      | 97.9 |
| <i>O. coarctata</i>                     | 89.3                                                                                                                                                                                                                                                                                               | 97.2 | 97.2 | 96.8 | 96.8 | 97.2 | 92.9 | 97.8 | 97.5 | 97.9 |      |

**Figure S3.** Sequence identity of NHX homologues identified in the *Oryza* genus.

|     | Logo | E-value  | Site | Width | Role                                         |
|-----|------|----------|------|-------|----------------------------------------------|
| 1.  |      | 1.4e-514 | 12   | 50    |                                              |
| 2.  |      | 3.2e-495 | 12   | 50    |                                              |
| 3.  |      | 1.0e-494 | 12   | 50    |                                              |
| 4.  |      | 2.5e-478 | 12   | 50    |                                              |
| 5.  |      | 2.4e-337 | 10   | 50    |                                              |
| 6.  |      | 2.7e-339 | 10   | 50    |                                              |
| 7.  |      | 3.0e-229 | 11   | 29    | Aspartate-alanine exchange (Asp-Al_Ex)       |
| 8.  |      | 1.2e-217 | 12   | 29    |                                              |
| 9.  |      | 1.9e-216 | 12   | 29    | Monovalent Cation:Proton Antiporter-1 (CPA1) |
| 10. |      | 2.9e-215 | 12   | 29    |                                              |

**Figure S4.** Various protein motifs found in representative *Oryza* NHX1s.

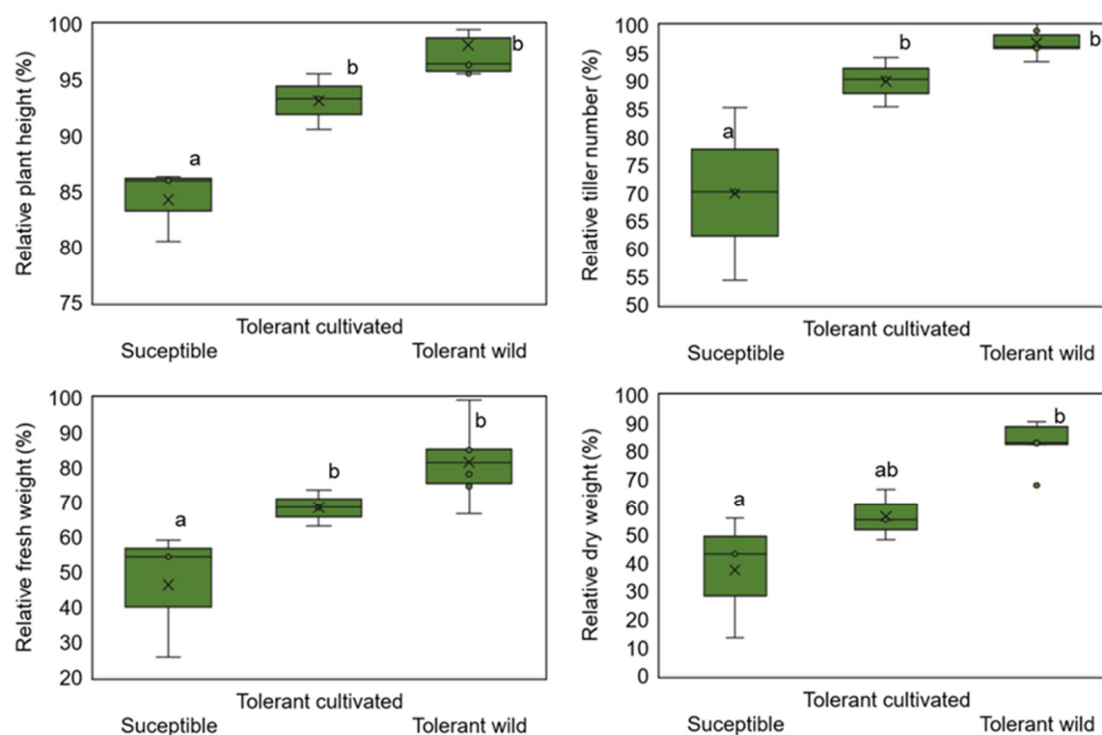

**Figure S5.** Variation of salinity tolerance in *Oryza* species. Phenotypic variation on the effect of salinity treatment on overall growth, Relative effects (% of control) of salinity on plant height, tiller number, fresh weight, and and dry weight. Different lowercase letters indicate significant differences at  $P < 0.05$  ( $n = 3-6$  *Oryza* lines) according to Duncan's Multiple Range Test.

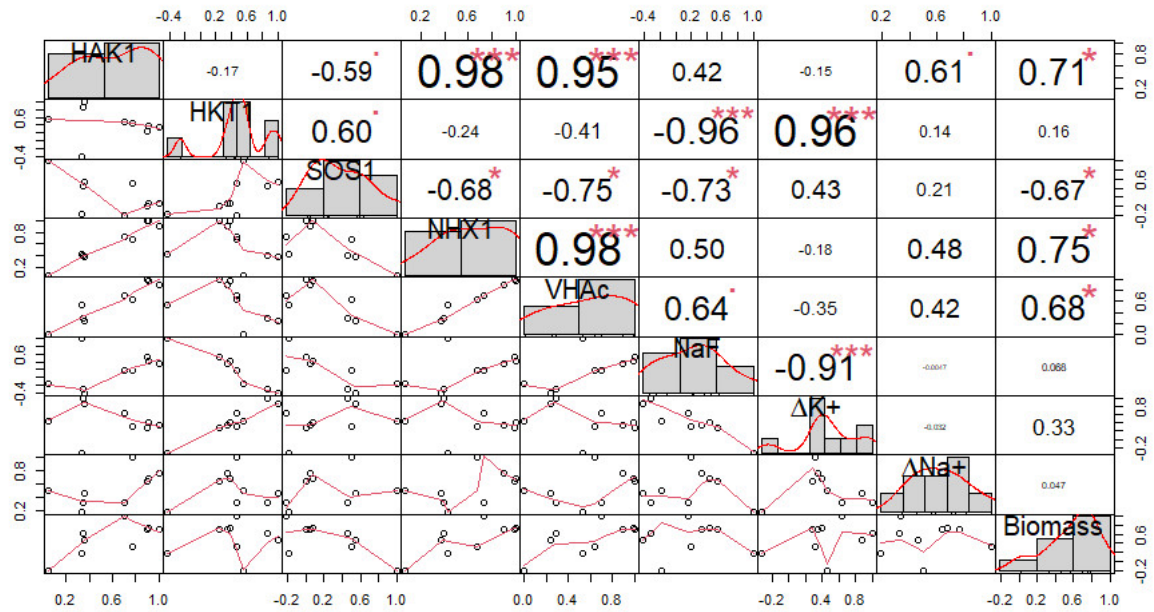

**Figure S6.** Relationship of gene expression of salinity transporters in ion transport and yield in response to salinity stress in cultivated and wild rice species. Spearman correlation matrix and histogram of phenotypic traits observed and gene expression of known salinity tolerant genes. The distribution of each variable is shown on the diagonal. \*\*\*, \*\*, \* indicate significant correlation at  $P < 0.001$ ,  $P < 0.01$  and  $P < 0.05$ . NaF- relative mesophyll  $Na^+$  fluorescence,  $\Delta K^+$ -  $K^+$  flux difference(stress-control),  $\Delta Na^+$ -  $Na^+$  flux difference (stress-control), Biomass – relative above ground biomass harvested at full maturity, *HAK1*, *HKT1*, *SOS1*, *NHX1* and *VHAc* - relative gene expression under salinity stress.

**Table S1.** Identification and sequence analysis of NHX1 in representative species.

| Classification   | Species                           | Length (aa) | MW (kD) | PI   |
|------------------|-----------------------------------|-------------|---------|------|
| Dicot            | <i>Arabidopsis thaliana</i>       | 529         | 58.87   | 7.84 |
|                  | <i>Oryza sativa</i>               | 545         | 59.91   | 7.93 |
| Monocot          | <i>Oryza coarctata</i>            | 539         | 59.45   | 7.85 |
|                  | <i>Zea mays</i>                   | 515         | 57.55   | 8.21 |
| Gymnosperm       | <i>Picea sitchensis</i>           | 535         | 59.09   | 8.29 |
| Fern             | <i>Pteris vittata</i>             | 463         | 50.91   | 6.1  |
| Lycophyte        | <i>Selaginella moellendorffii</i> | 532         | 58.93   | 8.58 |
| Liverwort        | <i>Marchantia polymorpha</i>      | 521         | 57.64   | 6.62 |
| Steptophyte Alga | <i>Klebsormidium nitens</i>       | 547         | 59.69   | 6.65 |
| Chlorophyte Alga | <i>Volvox carteri</i>             | 474         | 50.95   | 9.56 |
| Dictyosteliida   | <i>Dictyostelium discoideum</i>   | 674         | 75.52   | 4.31 |

**Table S2.** Number of NHX transporters mapped in representative species.

| Classifications | Species                           | NHX subtypes |    |     | Total |
|-----------------|-----------------------------------|--------------|----|-----|-------|
|                 |                                   | Vac          | PM | TGN |       |
| Algae           | <i>Chlamydomonas reinhardtii</i>  | 1            | 3  | 1   | 5     |
| Bryophytes      | <i>Physcomitrella patens</i>      | 5            | 2  | 2   | 9     |
| Lycophytes      | <i>Selaginella moellendorffii</i> | 2            | 2  | 2   | 6     |
| Gymnosperm      | <i>Picea sitchensis</i>           | 1            | ?  | ?   | ?     |
| Monocots        | <i>Zea Mays</i>                   | 6            | 2  | 2   | 10    |
|                 | <i>Sorghum bicolor</i>            | 4            | 2  | 1   | 7     |
| Eudicots        | <i>Oryza sativa</i>               | 4            | 2  | 1   | 7     |
|                 | <i>Arabidopsis thaliana</i>       | 4            | 4  | 2   | 10    |
|                 | <i>Gossypium hirsutum</i>         | 11           | 23 | 17  | 1     |
|                 | <i>Solanum lycopersicum</i>       | 5            | 3  | 1   | 9     |
|                 | <i>Glycine max</i>                | 11           | 7  | 3   | 21    |
|                 |                                   |              |    |     |       |

**Table S3.** The identification and sequence analysis of the Na<sup>+</sup>/H<sup>+</sup> antiporter (NHX) gene family in rice.

| <b>Gene</b>   | <b>Rice MSU<br/>Locus ID</b> | <b>Length<br/>(aa)</b> | <b>MW<br/>(kD)</b> | <b>PI</b> | <b>Subcellular Localization</b> |
|---------------|------------------------------|------------------------|--------------------|-----------|---------------------------------|
| <i>OsNHX1</i> | LOC_Os07g47100.2             | 536                    | 59.07              | 8.3       | Vacuolar                        |
| <i>OsNHX2</i> | LOC_Os11g42790.1             | 546                    | 59.92              | 7.9       | Vacuolar                        |
| <i>OsNHX3</i> | LOC_Os05g05590.1             | 529                    | 59.64              | 7.3       | Vacuolar                        |
| <i>OsNHX4</i> | LOC_Os06g21360.1             | 560                    | 58.22              | 6.3       | Vacuolar                        |
| <i>OsNHX5</i> | LOC_Os09g11450.1             | 550                    | 60.39              | 5.7       | Plasma Membrane                 |
| <i>OsNHX6</i> | LOC_Os09g30446.1             | 462                    | 31.07              | 5.5       | Plasma Membrane                 |
| <i>OsNHX7</i> | LOC_Os12g44360.2             | 1149                   | 127.91             | 6.8       | Trans-Golgi Network             |



**Table S4.** Number of NHX transporters mapped in in representative *Oryza* species.

| Species                             | Vac Class | Gene hit                                                                         | PM Class | Gene hit                 | TGN Class | Gene hit                                                             |
|-------------------------------------|-----------|----------------------------------------------------------------------------------|----------|--------------------------|-----------|----------------------------------------------------------------------|
| <i>Oryza sativa subsp. indica</i>   | 4         | BGIOSGA027380<br>BGIOSGA026347<br>BGIOSGA018801<br>BGIOSGA029567                 | 1        | BGIOSGA035749            | 2         | BGIOSGA029567<br>BGIOSGA030066                                       |
| <i>Oryza sativa subsp. japonica</i> | 4         | OsNHX1<br>OsNHX2<br>OsNHX3<br>OsNHX4                                             | 1        | SOS1                     | 2         | OsSTA230<br>OsNHX5                                                   |
| <i>Oryza rufipogon</i>              | 4         | ORUF105G03390<br>ORUF106G13400<br>ORUF107G26490<br>ORUF111G23040                 | 1        | ORUF109G04390            | 2         | ORUF109G15320<br>ORUF112G22630                                       |
| <i>Oryza meridionalis</i>           | 3         | OMERI05G03260<br>OMERI07G22210<br>OMERI11G17560                                  | 0        | ?                        | 2         | OMERI09G03010<br>OMERI09G11060                                       |
| <i>Oryza nivara</i>                 | 4         | ONIVA05G03230<br>ONIVA06G14580<br>ONIVA07G25170<br>ONIVA11G21550                 | 1        | ONIVA12G18960            | 2         | ONIVA09G04150<br>ONIVA09G14830                                       |
| <i>Oryza glaberrima</i>             | 4         | ORGLA09G0109500<br>ORGLA07G0266400<br>ORGLA07G0198900<br>ORGLA05G0031000         | 1        | ORGLA12G0176700          | 2         | ORGLA09G0109500<br>ORGLA12G0176700                                   |
| <i>Oryza barthii</i>                | 4         | OBART05G03250<br>OBART06G12670<br>OBART07G25570<br>OBART11G21190                 | 1        | OBART12G20310            | 2         | OBART09G03930<br>OBART09G14270                                       |
| <i>Oryza longistaminata</i>         | 4         | AMDW01040861.1_<br>F<br>KN538696.1_FG089<br>KN539398.1_FG001<br>KN540366.1_FG005 | 1        | KN538756.1_FG016         | 2         | KN539227.1_FG004<br>KN538880.1_FG014                                 |
| <i>Oryza glumipatula</i>            | 4         | OGLUM05G03300<br>OGLUM06G13560<br>OGLUM07G25540<br>OGLUM11G20600                 | 1        | OGLUM12G22080            | 2         | OGLUM09G04670<br>OGLUM09G14920                                       |
| <i>Oryza punctata</i>               | 4         | OPUNC05G03110<br>OPUNC06G12060<br>OPUNC07G23980<br>OPUNC11G17770                 | 1        | OPUNC12G18600            | 2         | OPUNC09G12770                                                        |
| <i>Oryza brachyantha</i>            | 5         | OB05G13170<br>OB06G21140<br>OB07G30930<br>OB11G25980<br>OB12G17900               | 2        | OB09G20810<br>OB12G27070 | 5         | OB0092G10010<br>OB04G14430<br>OB09G12460<br>OB09G12470<br>OB12G18280 |

**Table S5.** Identification and sequence analysis of NHX1 in representative *Oryza* species.

| <b>NHX1 species</b>              | <b>Genome</b> | <b>Length (aa)</b> | <b>MW (kD)</b> | <b>PI</b> |
|----------------------------------|---------------|--------------------|----------------|-----------|
| <i>O. sativa subsp. japonica</i> | AA            | 535                | 59.07          | 7.77      |
| <i>O. sativa subsp. indica</i>   | AA            | 498                | 54.85          | 8.34      |
| <i>O. glaberrima</i>             | AA            | 535                | 59.07          | 8.34      |
| <i>O. nivara</i>                 | AA            | 535                | 59.07          | 8.34      |
| <i>O. rufipogon</i>              | AA            | 535                | 59.07          | 8.34      |
| <i>O. meridionalis</i>           | AA            | 536                | 59.16          | 8.34      |
| <i>O. glumaepatula</i>           | AA            | 513                | 56.52          | 8.84      |
| <i>O. longistaminata</i>         | AA            | 539                | 59.88          | 9.51      |
| <i>O. barthii</i>                | BB            | 475                | 52.70          | 9.56      |
| <i>O. punctata</i>               | BB            | 536                | 58.95          | 8.10      |
| <i>O. brachyantha</i>            | FF            | 477                | 52.74          | 9.27      |
| <i>O. coarctata</i>              | KKLL          | 539                | 59.45          | 7.85      |

**Table S6.** Salinity ranking of *Oryza* species based on the relative value of the physiological parameters.

| Species                          | Genome | Gene Pool | RFW | RDW | RWC | Na <sup>+</sup> accumulation | ΔK <sup>+</sup> | ΔNa <sup>+</sup> | Overall | Tolerance Rank      |
|----------------------------------|--------|-----------|-----|-----|-----|------------------------------|-----------------|------------------|---------|---------------------|
| <i>O. brachyantha</i>            | FF     | Tertiary  | 1   | 1   | 3   | 1                            | 1               | 1                | 1.2     | Susceptible         |
| <i>O. sativa</i> cv. IR29        | AA     | Primary   | 2   | 3   | 4   | 2                            | 2               | 2                | 3.4     | Susceptible         |
| <i>O. sativa</i> cv. Koshihikari | AA     | Primary   | 3   | 2   | 7   | 3                            | 3               | 3                | 3.6     | Susceptible         |
| <i>O. punctata</i>               | BB     | Secondary | 4   | 4   | 1   | 5                            | 4               | 5                | 3.9     | Moderately Tolerant |
| <i>O. rufipogon</i>              | AA     | Secondary | 5   | 5   | 2   | 4                            | 5               | 4                | 3.9     | Moderately Tolerant |
| <i>O. australiensis</i>          | EE     | Secondary | 6   | 6   | 6   | 6                            | 6               | 6                | 6       | Tolerant            |
| <i>O. sativa</i> cv Pokkali      | AA     | Primary   | 7   | 7   | 5   | 7                            | 7               | 7                | 7.2     | Tolerant            |
| <i>O. latifolia</i>              | CCDD   | Secondary | 8   | 8   | 9   | 8                            | 8               | 8                | 7.4     | Tolerant            |
| <i>O. alta</i>                   | CCDD   | Secondary | 9   | 9   | 8   | 9                            | 9               | 9                | 8.6     | Tolerant            |
| <i>O. coarctata</i>              | KKLL   | Tertiary  | 10  | 10  | 10  | 10                           | 10              | 10               | 10      | Highly Tolerant     |

Abbreviations: RFW- relative fresh weight, RDW- relative dry weight, RWC- relative water content, Na<sup>+</sup> accumulation- relative mesophyll Na<sup>+</sup> fluorescence, ΔK<sup>+</sup>- K<sup>+</sup> flux difference(stress/control), ΔNa<sup>+</sup>- Na<sup>+</sup> flux difference (stress/control).
